# Supplementary material for: Effects of Inhaled Epoprostenol and Prone Positioning in Intubated Coronavirus Disease 2019 Patients With Refractory Hypoxemia
Source: PubMed Central journal article supplement — Crit Care Explor. 2020 Dec 16;2(12):e0307. doi: 10.1097/CCE.0000000000000307 (PMC7746203; doi:10.1097/cce.0000000000000307), 2020-12-16
Supplement: cc9-2-e0307-s001.pdf [file cc9-2-e0307-s001.pdf]

Supplemental Table 1. Pre and post responses to iEPO and PP for the 7 intubated COVID-19 patients who received iEPO under supine position

|                                                                     | Baseline       | <b>iEPO</b>   | p     | iEPO (few hours later) | <b>PP + iEPO</b> | p     |
|---------------------------------------------------------------------|----------------|---------------|-------|------------------------|------------------|-------|
| PaO <sub>2</sub> , mmHg <sup>a</sup>                                | 66.7 ± 16.2    | 87.0 ± 8.9    | 0.109 | 78.5 ± 13.6            | 120.7 ± 70.0     | 0.078 |
| PaO <sub>2</sub> /F <sub>I</sub> O <sub>2</sub> , mmHg <sup>a</sup> | 70.7 ± 9.2     | 94.5 ± 17.8   | 0.109 | 85.3 ± 21.1            | 141.7 ± 90.0     | 0.046 |
| SpO <sub>2</sub> , % <sup>b</sup>                                   | 86.0 ± 9.9     | 93.1 ± 3.0    | 0.034 | 86.5 ± 11.8            | 88.8 ± 6.7       | 0.465 |
| SpO <sub>2</sub> /F <sub>I</sub> O <sub>2</sub> <sup>b</sup>        | 106.6 ± 33.8   | 96.5 ± 10.2   | 1.0   | 92.4 ± 20.4            | 99.9 ± 15.1      | 0.465 |
| F <sub>I</sub> O <sub>2</sub>                                       | 1.0 (0.6, 1.0) | 1.0 (1.0,1.0) | 0.157 | 1.0 (0.8, 1.0)         | 0.8 (0.8,1.0)    | 0.157 |
| PEEP, cmH <sub>2</sub> O                                            | 14 (12, 16)    | 16 (14, 16)   | 0.131 | 16 (14, 16)            | 14 (12, 16)      | 0.317 |
| Cst, ml/cmH <sub>2</sub> O <sup>c</sup>                             | 20.9 ± 8.5     | 24.0 ± 14.1   | 0.593 | 26.7 ± 9.0             | 28.0 ± 15.5      | 0.893 |

iEPO, inhaled epoprostenol; PaO<sub>2</sub>, arterial oxygen partial pressure; F<sub>I</sub>O<sub>2</sub>, fraction of inspired oxygen; SpO<sub>2</sub>, pulse oxygen saturation; PEEP, positive end expiratory pressure; Cst, static compliance of respiratory system.

<sup>a</sup> data was available in 3,3,6 and 6 patients, respectively; <sup>b</sup> data was available in 7,7,4 and 4 patients, respectively; <sup>c</sup> data was available in 3,3,5 and 5 patients, respectively.
